# Supplementary material
Source: MDPI journal article supplement (https://www.mdpi.com/2673-7418/1/4/22)
Supplement: s1 [file s1 › geomatics-1371937-supplementary.pdf]

# Modelling physical accessibility to public green spaces in Switzerland to support the SDG11

Camille Chênes, Gregory Giuliani and Nicolas Ray

## Supplementary Material

**Table S1:** Reclassification of the existing CORINE landcover categories.

| Code | CORINE landcover Class                                                                | New code | Reclassification  |
|------|---------------------------------------------------------------------------------------|----------|-------------------|
| 111  | Continuous urban fabric                                                               | 1        | Urban area        |
| 112  | Discontinuous urban fabric                                                            |          |                   |
| 121  | Industrial or commercial units                                                        |          |                   |
| 122  | Road and rail networks and associated land                                            |          |                   |
| 123  | Port areas                                                                            |          |                   |
| 124  | Airports                                                                              |          |                   |
| 131  | Mineral extraction sites                                                              |          |                   |
| 133  | Construction sites                                                                    |          |                   |
| 141  | Green urban areas                                                                     |          |                   |
| 142  | Sport and leisure facilities                                                          |          |                   |
| 211  | Non irrigated arable land                                                             | 2        | Agricultural land |
| 221  | Vineyards                                                                             |          |                   |
| 222  | Fruit trees and berry plantations                                                     |          |                   |
| 231  | Pastures                                                                              |          |                   |
| 242  | Complex cultivation patterns                                                          |          |                   |
| 243  | Land principally occupied by agriculture with significant areas of natural vegetation | 3        | Natural area      |
| 311  | Broadleaved forest                                                                    |          |                   |
| 312  | Coniferous forest                                                                     |          |                   |
| 313  | Mixed forest                                                                          |          |                   |
| 321  | Natural grassland                                                                     |          |                   |
| 322  | Moors and heathland                                                                   |          |                   |
| 324  | Transitional woodland shrub                                                           |          |                   |
| 331  | Beaches, dunes, sands                                                                 |          |                   |
| 332  | Bare rocks                                                                            |          |                   |
| 333  | Sparsely vegetated areas                                                              |          |                   |
| 335  | Glaciers and perpetual snow                                                           | 4        | Wetlands          |
| 411  | Inlands marshes                                                                       |          |                   |
| 511  | Water courses                                                                         | 5        | Water area        |
| 512  | Water bodies                                                                          |          |                   |

**Table S2:** Percentage of population that have access to UGS within a maximum travel time, using AccessMod on with the UGS centroids, and ignoring the influence of the DEM (isotropic mode).

| <i>[%] Pop. Covered in</i> | <i>5'</i> | <i>10'</i> | <i>15'</i> |           | <i>5'</i> | <i>10'</i> | <i>15'</i> |
|----------------------------|-----------|------------|------------|-----------|-----------|------------|------------|
| <b>ZH</b>                  | 33.63     | 60.55      | 76.72      | <b>SH</b> | 41.66     | 62.11      | 73.11      |
| <b>BE</b>                  | 31.73     | 58.91      | 74.45      | <b>AR</b> | 21.79     | 41.50      | 63.45      |
| <b>LU</b>                  | 26.23     | 48.79      | 66.86      | <b>AI</b> | 15.72     | 42.16      | 53.12      |
| <b>UR</b>                  | 44.73     | 58.26      | 63.85      | <b>SG</b> | 32.06     | 58.92      | 73.36      |
| <b>SZ</b>                  | 20.59     | 48.61      | 65.94      | <b>GR</b> | 19.14     | 36.18      | 51.17      |
| <b>OW</b>                  | 4.06      | 8.60       | 12.61      | <b>AG</b> | 22.60     | 51.52      | 72.52      |
| <b>NW</b>                  | 20.36     | 43.96      | 63.43      | <b>TG</b> | 30.17     | 62.68      | 83.56      |
| <b>GL</b>                  | 21.27     | 41.85      | 55.91      | <b>TI</b> | 49.12     | 74.19      | 83.24      |
| <b>ZG</b>                  | 28.82     | 67.05      | 81.32      | <b>VD</b> | 47.70     | 75.42      | 89.02      |
| <b>FR</b>                  | 25.85     | 49.08      | 67.64      | <b>VS</b> | 32.38     | 57.60      | 68.77      |
| <b>SO</b>                  | 23.64     | 57.24      | 78.02      | <b>NE</b> | 2.28      | 6.40       | 11.75      |
| <b>BS</b>                  | 78.26     | 93.47      | 98.07      | <b>GE</b> | 91.91     | 98.16      | 99.30      |
| <b>BL</b>                  | 44.79     | 73.84      | 86.89      | <b>JU</b> | 27.38     | 47.90      | 66.89      |

**Table S3:** Percentage of population that have access to UGS within a maximum travel time, using ArcGIS cost-distance analysis in isotropic mode.

| <i>[%] Pop. Covered in</i> | <i>5'</i> | <i>10'</i> | <i>15'</i> |           | <i>5'</i> | <i>10'</i> | <i>15'</i> |
|----------------------------|-----------|------------|------------|-----------|-----------|------------|------------|
| <b>ZH</b>                  | 33.61     | 60.54      | 76.71      | <b>SH</b> | 41.47     | 62.01      | 72.93      |
| <b>BE</b>                  | 31.64     | 58.79      | 74.32      | <b>AR</b> | 21.76     | 41.50      | 63.45      |
| <b>LU</b>                  | 26.21     | 48.73      | 66.68      | <b>AI</b> | 15.72     | 42.16      | 53.12      |
| <b>UR</b>                  | 44.67     | 58.02      | 63.83      | <b>SG</b> | 31.97     | 58.86      | 73.29      |
| <b>SZ</b>                  | 20.48     | 48.44      | 65.71      | <b>GR</b> | 18.98     | 36.04      | 50.86      |
| <b>OW</b>                  | 4.06      | 8.58       | 12.59      | <b>AG</b> | 22.55     | 51.34      | 72.38      |
| <b>NW</b>                  | 20.36     | 43.96      | 63.43      | <b>TG</b> | 30.12     | 62.57      | 83.47      |
| <b>GL</b>                  | 21.17     | 41.69      | 55.64      | <b>TI</b> | 49.03     | 74.07      | 83.10      |
| <b>ZG</b>                  | 28.82     | 66.99      | 81.30      | <b>VD</b> | 47.58     | 75.38      | 88.99      |
| <b>FR</b>                  | 25.73     | 48.90      | 67.46      | <b>VS</b> | 32.21     | 57.42      | 68.69      |
| <b>SO</b>                  | 23.55     | 57.04      | 77.91      | <b>NE</b> | 2.28      | 6.15       | 11.53      |
| <b>BS</b>                  | 78.25     | 93.47      | 98.07      | <b>GE</b> | 91.90     | 98.16      | 99.30      |
| <b>BL</b>                  | 44.75     | 73.77      | 86.85      | <b>JU</b> | 27.38     | 47.79      | 66.75      |

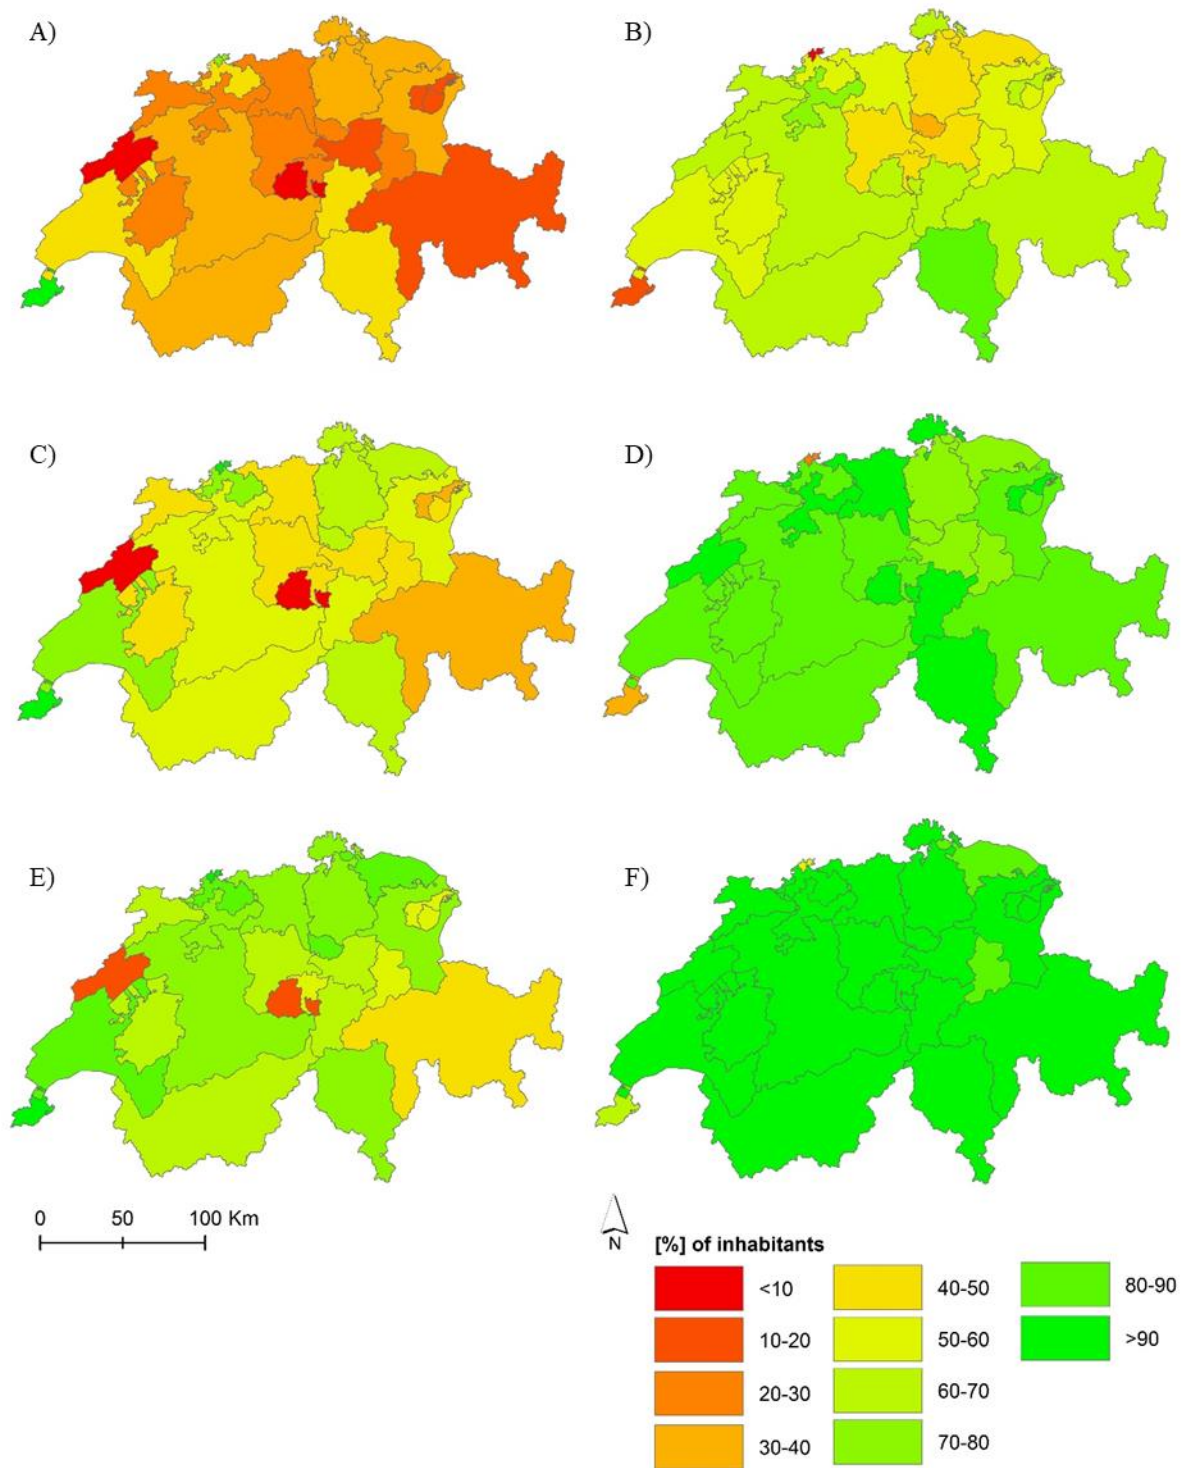

**Figure S1:** Percentage of the population per Canton that have access to the centroid of the nearest Urban Green Space within A) 5min, C) 10min and E) 15 minutes, using the walking and motorized travel model. Percentage of the population per Canton that have access to the nearest forests patch within A) 5min, C) 10min and E) 15 minutes, using the Cost Distance method with the walking and motorized travel model.
